# Supplementary material for: Comprehensive pan-cancer analysis of TRAP1 and its experimental validation in hepatocellular carcinoma
Source: Discov Oncol. 2025 Dec 20;17:152. doi: 10.1007/s12672-025-04238-9 (PMC12835488; doi:10.1007/s12672-025-04238-9)
Supplement: Supplementary file 1 — Supplementary Material 1. [file 12672_2025_4238_MOESM1_ESM.xlsx]

## Sheet: Sheet1
Name abbreviation	Tumor
ACC	Adrenocortical carcinoma
BLCA	Bladder Urothelial Carcinoma
BRCA	Breast invasive carcinoma
CESC	Cervical squamous cell carcinoma and endocervical adenocarcinoma
CHOL	Cholangiocarcinoma
COAD	Colon adenocarcinoma
COADREAD	Colon adenocarcinoma/Rectum adenocarcinoma
DLBC	Lymphoid Neoplasm Diffuse Large B-cell Lymphoma
ESCA	Esophageal carcinoma
GBM	Glioblastoma multiforme
GBMLGG	Glioma
HNSC	Head and Neck squamous cell carcinoma
KICH	Kidney Chromophobe
KIRC	Kidney renal clear cell carcinoma
KIRP	Kidney renal papillary cell carcinoma
LAML	Acute Myeloid Leukemia
​​LGG	Brain Lower Grade Glioma
LIHC	Liver hepatocellular carcinoma
LUAD	Lung adenocarcinoma
LUSC	Lung squamous cell carcinoma
​​NB​	Neuroblastoma
​​NSCLC	Non-small-cell lung carcinoma
​​OV	Ovarian serous cystadenocarcinoma
PAAD	Pancreatic adenocarcinoma
​​PCPG	Pheochromocytoma and Paraganglioma
​​PRAD​​	Prostate adenocarcinoma
​​RCC	Renal Cell Carcinoma
READ	Rectum adenocarcinoma
​​SARC	Sarcoma
SKCM	Skin Cutaneous Melanoma
STAD	Stomach adenocarcinoma
STES	Stomach and Esophageal carcinoma
​​TGCT	Testicular Germ Cell Tumors
​​THCA	Thyroid carcinoma
UCEC	Uterine Corpus Endometrial Carcinoma
​​WT	High-Risk Wilms Tumor
