# Supplementary material for: Comprehensive pan-cancer analysis of TRAP1 and its experimental validation in hepatocellular carcinoma
Source: Discov Oncol. 2025 Dec 20;17:152. doi: 10.1007/s12672-025-04238-9 (PMC12835488; doi:10.1007/s12672-025-04238-9)
Supplement: Supplementary file 2 — Supplementary Material 2. [file 12672_2025_4238_MOESM2_ESM.xlsx]

## Sheet: Sheet1
Tumor	Comparison	Statistical significance（*Indicates a significant difference）
Bladder urothelial carcinoma	Normal-vs-Primary	1.00649999446034E-08*
	Normal-vs-Stage1	0.90874
	Normal-vs-Stage2	6.45139999977395E-07*
	Normal-vs-Stage3	8.97849999903499E-08*
	Normal-vs-Stage4	0.0000150206999999236*
Breast invasive carcinoma	Normal-vs-Primary	1.62436730732907E-12*
	Normal-vs-Stage1	1.43218770176645E-13*
	Normal-vs-Stage2	1.62436730732907E-12*
	Normal-vs-Stage3	<1E-12*
	Normal-vs-Stage4	0.00112205*
Cervical squamous cell carcinoma	Normal-vs-Primary	0.036157*
	Normal-vs-Stage1	0.022976*
	Normal-vs-Stage2	0.042716*
	Normal-vs-Stage3	1.19070000004218E-06*
	Normal-vs-Stage4	0.039396*
Cholangiocarcinoma	Normal-vs-Primary	3.83139964199586E-10*
	Normal-vs-Stage1	4.4764000000086E-06*
	Normal-vs-Stage2	0.0021436*
	Normal-vs-Stage3	N/A
	Normal-vs-Stage4	0.0060423*
Colon adenocarcinoma	Normal-vs-Primary	<1E-12*
	Normal-vs-Stage1	<1E-12*
	Normal-vs-Stage2	1.62458935193399E-12*
	Normal-vs-Stage3	1.62447832963153E-12*
	Normal-vs-Stage4	1.63669078290241E-12*
Esophageal carcinoma	Normal-vs-Primary	0.000036162999999978*
	Normal-vs-Stage1	0.00085726*
	Normal-vs-Stage2	4.12040000000724E-05*
	Normal-vs-Stage3	0.000140779*
	Normal-vs-Stage4	2.39220000000095E-05*
Head and Neck squamous cell carcinoma	Normal-vs-Primary	7.26250000027129E-07*
	Normal-vs-Stage1	0.73964
	Normal-vs-Stage2	0.0042773*
	Normal-vs-Stage3	0.00055616*
	Normal-vs-Stage4	2.72780000032391E-07*
Kidney Chromophobe	Normal-vs-Primary	8.68839999945692E-07*
	Normal-vs-Stage1	4.11710000000065E-05*
	Normal-vs-Stage2	0.0033761*
	Normal-vs-Stage3	1.80140999999079E-05*
	Normal-vs-Stage4	0.29136
Kidney renal clear cell carcinoma	Normal-vs-Primary	8.63330000044904E-07*
	Normal-vs-Stage1	9.62909996182759E-09*
	Normal-vs-Stage2	0.0178955*
	Normal-vs-Stage3	0.0108576*
	Normal-vs-Stage4	0.095277
Kidney renal papillary cell carcinoma	Normal-vs-Primary	8.31557045444242E-13*
	Normal-vs-Stage1	8.51669956780654E-10*
	Normal-vs-Stage2	0.0114019*
	Normal-vs-Stage3	0.000123905*
	Normal-vs-Stage4	0.031556*
Liver hepatocellular carcinoma	Normal-vs-Primary	<1E-12*
	Normal-vs-Stage1	6.960299003822E-11*
	Normal-vs-Stage2	4.32799999949829E-07*
	Normal-vs-Stage3	1.93369997791848E-09*
	Normal-vs-Stage4	0.107423
Lung adenocarcinoma	Normal-vs-Primary	1.62447832963153E-12*
	Normal-vs-Stage1	<1E-12*
	Normal-vs-Stage2	1.62447832963153E-12*
	Normal-vs-Stage3	1.62447832963153E-12*
	Normal-vs-Stage4	1.6641021893804E-11*
Lung squamous cell carcinoma	Normal-vs-Primary	<1E-12*
	Normal-vs-Stage1	<1E-12*
	Normal-vs-Stage2	1.62436730732907E-12*
	Normal-vs-Stage3	1.62447832963153E-12*
	Normal-vs-Stage4	0.00095791*
Rectum adenocarcinoma	Normal-vs-Primary	8.88178419700125E-16*
	Normal-vs-Stage1	3.99413835339146E-12*
	Normal-vs-Stage2	1.64057656348859E-12*
	Normal-vs-Stage3	1.33226762955019E-15*
	Normal-vs-Stage4	3.20390000085879E-08*
Stomach adenocarcinoma	Normal-vs-Primary	1.62447832963153E-12*
	Normal-vs-Stage1	0.0058395*
	Normal-vs-Stage2	1.62447832963153E-12*
	Normal-vs-Stage3	1.62447832963153E-12*
	Normal-vs-Stage4	4.71859995521129E-09*
Uterine Corpus Endometrial Carcinoma	Normal-vs-Primary	1.51269996528924E-09*
	Normal-vs-Stage1	1.80329973176185E-10*
	Normal-vs-Stage2	0.00130293*
	Normal-vs-Stage3	1.42420000004417E-06*
	Normal-vs-Stage4	0.0049168*
